# Supplementary material for: From technology transfer to innovation-based rural development: A necessary turn at the Indio Hatuey experimental station
Source: Oxford University Press journal article supplement (doi:10.1525/elementa.325), 2018-01-01
Supplement: elementa-6-325-s1.pdf [file elementa-6-325-s1.pdf]

**Para Citar:** Miranda Tortoló, T., Machado Martínez, H., Suset Pérez, A., Lamela López, L., Oropesa Casanova, K., Alfonso Yanes, J.A., García Naranjo, M.A. and Campos Acosta, I.M., 2018. From technology transfer to innovation-based rural development: A necessary turn at the Indio Hatuey experimental station. *Elem Sci Anth*, 6(1), p.81. DOI: <http://doi.org/10.1525/elementa.325>

## **De la transferencia de tecnología al desarrollo rural desde la innovación: Un giro necesario en la Estación Experimental Indio Hatuey**

Taymer Miranda Tortoló<sup>1\*</sup>, Hilda Machado Martínez<sup>1</sup>, Antonio Suset Pérez<sup>1</sup>, Luis Lamela López<sup>1</sup>, Katerine Oropesa Casanova<sup>1</sup>, Juan Alberio Alfonso Yanes<sup>2</sup>, Marco Antonio García Naranjo<sup>2</sup>, Iraida María Campos Acosta<sup>2</sup>

<sup>1</sup>Estación Experimental de Pastos y Forrajes Indio Hatuey (EEPFIH), Universidad de Matanzas, Cuba

<sup>2</sup>Filial Universitaria Municipal, Dora Alonso de Perico, Universidad de Matanzas, Cuba

\*miranda@ihatuey.cu

### **Resumen**

El derrumbe del campo socialista a principios de los años 90 provocó una crisis económica severa en Cuba que desencadenó varios procesos de cambio para enfrentar la problemática. Uno de estos fue repensar el rol del sector científico en la gestión y desarrollo de la ciencia, tecnología e innovación, y llevarlo desde un enfoque reduccionista a un enfoque holístico, endógeno y territorial. Este artículo describe el proceso de cambio que se produjo en la Estación Experimental de Pastos y Forrajes de Indio Hatuey (EEPFIH), estación experimental de investigación y docencia en la provincia de Matanzas en Cuba. Además, presenta resultados ecológicos obtenidos en fincas producto del nuevo enfoque de trabajo y resultados institucionales como la creación de nuevas estructuras, que permiten enfrentar problemáticas de seguridad y soberanía alimentaria, agricultura sostenible y cambio climático a nivel local y territorial. Las transformaciones logradas permitieron a la EEPFIH responder eficazmente a demandas de la sociedad cubana en integración con otras instituciones mediante la implementación de prácticas que estimulan el protagonismo de estas instituciones en la gestión de su desarrollo. Se abrieron espacios de intercambio e innovación más horizontales y se establecieron nuevos mecanismos de gestión que consolidan las alianzas y vínculos entre actores a distintos niveles.

## Introducción

El derrumbe del campo socialista, la inviabilidad del modelo económico implementado en Cuba, el efecto devastador de los huracanes y el bloqueo de los Estados Unidos de América, sumados a las transformaciones de la economía mundial en la década de los noventa, desencadenaron numerosos procesos de cambio en la economía cubana. Estos cambios tuvieron como objetivo detener la caída de los niveles de actividad de la economía nacional.

Entre las principales transformaciones promovidas estuvo la apertura a las inversiones extranjeras mediante la creación de empresas mixtas con control mayoritario de la parte cubana, la despenalización de la tenencia de divisas y el reconocimiento del sector privado como nuevo actor económico, con el objetivo de liberar al sector estatal de gran parte de la responsabilidad en la producción de bienes y servicios. Se congelaron los salarios para reducir el efecto de la crisis sobre los trabajadores y se implantó un nuevo signo monetario convertible (convertible cubano, CUC por sus siglas en español) de circulación paralela. Además, se aprobó una ley que estableció los principios generales y tributos sobre los cuales se sostendría el sistema impositivo cubano y se implementaron medidas para reducir el subsidio y los gastos presupuestarios e incrementar los ingresos tributarios en el sector estatal. En paralelo, con el objetivo de estimular el incremento de las producciones agropecuarias con destino al consumo nacional, se fomentaron los mercados agropecuarios, se inicia la entrega de tierras ociosas en usufructo y se crean las Unidades Básicas de Producción Cooperativa como resultado de la desagregación de empresas estatales (González, 1995).

Este nuevo contexto obligó al sector científico a repensar la gestión de la ciencia, la tecnología, y la innovación en Cuba. La barrera fundamental fue superar el enfoque reduccionista, que como en el resto del mundo e influenciado por Rene Descartes, sentó las bases del racionalismo científico moderno el cual, plantea que para comprender y conocer un problema complejo, hay que reducirlo a sus partes más simples (Sarandón y Flores, 2009).

Así, el reduccionismo científico perpetúa y refuerza una concepción atomizada y dispersa del mundo que se generaliza. De ahí que germina la idea de que cada pequeño compartimento del saber y del hacer es independiente (Viniegra-Velázquez, 2014a). El discurso científico reduccionista, no solo tiene escasa relevancia en la solución de los grandes problemas de la humanidad como la exclusión progresiva de

sectores mayoritarios de la población y la devastación de los ecosistemas, sino que hace contribuciones decisivas al mantenimiento de la desigualdad económica y social en el mundo (Viniega- Velásques, 2014b).

El positivismo (o la idea de que solo la evidencia científica es conocimiento valida) marcó el desarrollo de la ciencia moderna como única forma de producción de conocimiento hasta mediados del siglo XX (Álava y Orellana, 2014). Este enfoque que contribuyó de manera significativa al progreso científico-técnico de la humanidad enfrenta ahora disímiles dificultades para la explicación de muchos sistemas, incluidos los de producción agropecuaria y con especial complejidad los sistemas de producción campesinos, donde es imposible comprender la conducta global sin considerar de manera interrelacionada los componentes constituyentes y sus complejas interacciones (Venegas y Siau, 1994). De ahí que en los últimos años se produce el surgimiento de nuevos paradigmas, e.g. la teoría de la complejidad, la teoría de los sistemas, las metodologías participativas (Álava y Orellana, 2014) y la agroecología (Paleologos *et al.*, 2017).

Ante esta realidad, la adopción de un nuevo enfoque, que priorizara la restauración de los recursos naturales y los ecosistemas donde se desarrollan los sistemas productivos agrícolas, y el fomento de la economía empresarial y la gestión familiar como elemento esencial para alcanzar la soberanía alimentaria de la nación, era apremiante. La implementación del nuevo enfoque necesitaba del involucramiento de instituciones como el Sistema de Ciencia y Tecnología, el Ministerio de la Agricultura y el Sistema de Educación Agrícola. Estas instituciones no estaban en capacidad de dar respuestas a la situación pues su accionar respondía, de forma general, al enfoque reduccionista (Machado *et al.*, 2009) que sirvió de guía al modelo de desarrollo agrícola adoptado en Cuba, a saber: Revolución Verde como paradigma que funcionaba con el suministro de maquinaria y otros insumos agrícolas importados a precios preferenciales del campo socialista europeo.

No obstante, en este contexto, numerosas instituciones a nivel nacional se esforzaron por ampliar su capacidad de respuesta al contexto cambiante de la economía cubana. Se necesitaba “que la iniciativa de transformación institucional tuviera como propósito cambiar las personas que cambian las cosas en lugar de cambiar las cosas (productos, servicios y procesos) para que luego las personas cambien” (Álvarez *et al.*, 2005. Pág.70), con la inclusión y consideración de una alternativa que valore el mejoramiento de la cotidianidad de las localidades rurales asociadas a la producción agropecuaria.

En este sentido, Albuquerque y Pérez (2013) plantean que América Latina y Caribe, se encuentra en una larga fase de transición tecnológica y de reestructuración económica y social, en la cual las variables clave

son: 1) la incorporación de innovaciones en el tejido productivo de cada ámbito territorial; 2) la superior calificación de los recursos humanos según las necesidades locales; 3) la atención a las características del medio ambiente local; y 4) la adaptación institucional que requieren las nuevas formas de gestión en el conjunto de organizaciones existentes (privadas o públicas) entre otras.

En Cuba, esto deberá lograrse, mediante la aplicación de nuevas técnicas y metodologías de trabajo que conlleven importantes transformaciones en las prácticas y sistemas gerenciales prevalecientes hasta la fecha. De este modo, los procesos de cambio estructural ante estas exigencias requerirán un planteamiento eficaz y eficiente de reestructuración desde sus propios escenarios territoriales y no de forma abstracta.

Este trabajo tiene como objetivo mostrar los resultados más relevantes obtenidos en el proceso de transformación de la EEPFIH, y de acompañamiento a localidades y entidades agroproductivas durante la búsqueda de nuevas formas de enfocar la transferencia de tecnologías como un componente del desarrollo territorial y rural. Este proceso implicó la apropiación de nuevos conceptos y construcciones sociales que permitieron acercar los modos de actuación hacia a la innovación, como factor clave, para favorecer procesos de transformación socio-económica en estos contextos.

## **El caso de la Estación Experimental de Pastos y Forrajes Indio Hatuey**

La Estación Experimental de Pastos y Forrajes Indio Hatuey (EEPFIH), fundada en 1962, dedicó sus esfuerzos hasta los años 90 del siglo XX a la obtención de variedades de pastos y forrajes y sus tecnologías de producción, así como al desarrollo de nuevos alimentos para la ganadería, con el énfasis en el desarrollo de tecnologías como fin.

A partir del año 1996, teniendo en cuenta los cambios en el contexto cubano, debido a la crisis económica provocada por la pérdida de sus mercados, que exigía nuevas perspectivas de análisis sobre la economía y la producción, la EEPFIH consideró que el desarrollo sostenible del sector agropecuario del país requería de la revisión de los paradigmas, marcos teóricos y estrategias de intervención en la gestión de las ciencias. De ahí que se decidiera incorporar los estudios socioeconómicos y ambientales como una línea de trabajo, y acercar el escenario de la investigación a la base productiva y comunitaria.

En 1999 se creó dentro de la EEPFIH el Grupo de Socio-economía (actual Grupo de Desarrollo Local Sostenible) y se comenzó a trabajar con el fin de apoyar el desarrollo agropecuario en el municipio

Martí de la provincia de Matanzas (situada en la región central del país), y con posterioridad en otros municipios de la misma provincia. El trabajo se realizó desde una visión socioeconómica y técnico-productiva, donde se probaron procedimientos metodológicos basados en las técnicas desarrolladas por la International Union for Conservation of Nature, UICN por sus siglas en español (1997), la Red Nuevo Paradigma<sup>1</sup> (De Souza Silva et al., 2005) y el Ministerio de Economía y Planificación (MEP) en conjunto con la EEPFIH (Machado *et al.*, 2008).

El municipio Martí fue seleccionado para iniciar las investigaciones con el nuevo enfoque constructivista<sup>2</sup> (desarrollado por las metodologías antes mencionadas) atendiendo a los siguientes factores: a) Martí fue uno de los municipios más afectados por la crisis en la provincia de Matanzas, b) la ganadería es su base económica fundamental, c) poseía todos los tipos de tenencia de la tierra autorizados por la legislación vigente en aquel momento en Cuba, y d) muy importantemente, se encuentra situado en la frontera del municipio donde está enclavada la EEPFIH, teniendo en cuenta que la crisis económica también afectó la disponibilidad de recursos destinados a investigación y desarrollo, lo que dificultaba sobre todo la transportation a grandes distancias.

En esta etapa se realizaron diagnósticos participativos con representantes de diversos sectores sociales del municipio Martí (pobladores, técnicos, empresarios, funcionarios e investigadores de la EEPFIH e instituciones académicas locales); y se acompañó la implementación de la estrategia de desarrollo municipal que incluyó la elaboración de programas y proyectos de mejora socioeconómica, institucional y agro-productiva como vía de implementación de transformaciones en el ámbito empresarial, de cooperativas y fincas y también de comunidades.

---

<sup>1</sup> “A partir de su tesis central de que la humanidad está experimentando un cambio de época y no una época de cambios, la Red Nuevo Paradigma, del Instituto Internacional de Investigación sobre Políticas Alimentares (IFPRI), financiada por la Agencia Suiza para el Desarrollo y la Cooperación (COSUDE), comparte una propuesta “diferente” para la innovación institucional. La Red demuestra que los cambios globales en marcha no pertenecen a la época del industrialismo sino que están creando otra época histórica. La Red asume que el papel de la innovación institucional debe ser cambiar las “personas” que cambian las cosas, diferente de la innovación tecnológica que cambia las “cosas” para cambiar las personas. La innovación tecnológica privilegia la dimensión “dura” de la realidad; la innovación institucional privilegia su dimensión “blanda”, construida a partir de ideas e ideales, valores y creencias, principios y promesas, leyes y políticas, reglas y roles, decisiones y acciones de los seres humanos. La Red nos propone un modo sui generis de interpretar la realidad institucional y de intervenir para transformarla, con implicaciones para la innovación y la cooperación” (De Souza Silva, et al., 2005, pág. 7).

<sup>2</sup> El enfoque constructivista asume que hay múltiples realidades, todas dependientes de la percepción de los diferentes actores y que esta se construye de las relaciones entre los fenómenos. Además defiende que cualquier intervención debe ser negociada.

El trabajo realizado permitió una mejor comprensión de la realidad local desde las dimensiones sociales, económicas y ambientales. Esta mirada propició un cambio hacia una visión de desarrollo rural de carácter contextual y constructivista, que reconoció la coexistencia en un mismo espacio social de múltiples realidades, todas dependientes de la percepción de los diferentes actores del desarrollo con énfasis en la creación de capacidades humanas, tanto en la institución como en su ámbito de influencia. Se adoptó entonces, desde la EEPFIH, la visión del desarrollo con un enfoque de sistema (Machado *et al.*, 2009), lo que requería un progreso global tanto en materia económica, productiva y social, así como en los órdenes ambiental y humano (Pichs, 2002).

Esta voluntad de progreso condujo a la institución a modificar su misión inicial (i.e. realizar investigaciones para el desarrollo de una ganadería a base de pastos, con atención priorizada a la búsqueda y evaluación de plantas pratenses y forrajeras que superaran las limitaciones de los pastos naturales existentes en el país), por una mucho más abarcadora en la que se aspira a contribuir al desarrollo local sostenible a través de modelos agroecológicos que integren la producción de alimentos y energía, dirigido a fomentar el desarrollo socioeconómico, el cuidado del medio ambiente y el bienestar humano con equidad de género. Con la nueva misión, se persiguieron tres objetivos: el crecimiento económico, la equidad (social, económica y ambiental) y la sustentabilidad ambiental (Dourojeanni, 2000; Asnar y Barrón, 2017). Esto permitió hacer recomendaciones más ajustadas a los escenarios de trabajo.

Como parte de este trabajo, entre los años 2000-2013, se estudió el papel de los directivos de cuatro cooperativas agropecuarias en el proceso productivo y las relaciones entre la comunidad, la entidad productiva y el gobierno local a partir del comportamiento social de los sujetos involucrados en el proceso de desarrollo (Ver Miranda *et al.*, 2002; González, 2003a, 2003b; Machado *et al.*, 2009; 2013; Mesa y Machado, 2009; Suset *et al.*, 2007; Suset *et al.*, 2013). Se realizaron importantes experiencias con la participación de los actores sociales municipales, en particular en el municipio Martí, mediante programas de capacitación, diagnósticos y planificación participativa del desarrollo como parte de un proyecto institucional financiado por la Delegación del Ministerio de Ciencia y Tecnología de la Provincia de Matanzas con los objetivos de conocer la problemática económica, social y ambiental y proponer soluciones novedosas. Las investigaciones realizadas evidenciaron que una de las causas fundamentales de la lentitud en la recuperación de los indicadores del nivel de vida de los años 80, era la persistencia de un comportamiento social dependiente del contexto externo. Esto era el producto de la “cultura de la espera” creada a partir del enfoque paternalista del desarrollo, anterior a la crisis (Machado *et al.*, 2009).

Se pudo constatar que la falta de percepción de la responsabilidad de la entidad productiva, representativa del sector agrícola, respecto a la comunidad que la sustenta, limitaba el desarrollo de la localidad como consecuencia de una gestión de los recursos naturales con enfoque de desarrollo sectorial (de producción) y no territorial (Suset, 2011).

## **El trabajo en redes con otras instituciones y sector productivo privado**

En el ambiente cambiante y de crisis de la economía, varias instituciones de investigación y desarrollo, a nivel nacional, se sumaron a esfuerzos emergentes para promover el desarrollo a escala local. Así, en el primer decenio del presente siglo y en el marco de los estudios de la Línea de Investigación sobre Desarrollo Agrario y Local Sostenible de la EEPFIH se constituyó el Centro Local de Innovación Agropecuaria (CLIA), para facilitar la participación multisectorial en el diseño, construcción, implementación y evaluación de tecnologías locales para su incorporación en el sector agropecuario a esa escala.

EL CLIA forma parte de una iniciativa especialmente innovadora llamada Programa de Innovación Agrícola Local (PIAL). El PIAL es coordinado por el Instituto Nacional de Ciencias Agrícolas (INCA) y apoyado por la cooperación internacional de COSUDE (Miranda, 2012). El PIAL empezó como una iniciativa que promueve el fitomejoramiento participativo como proceso esencial para lograr semillas adecuadas, adaptadas y resilientes a áreas locales para asegurar la seguridad y soberanía alimentaria. Después de 17 años de evolución y 4 fases de implementación, hoy en día el fruto es el Sistema de Innovación Agropecuaria Local (SIAL), lo cual abarca mucho más que los primeros años del proyecto de PIAL. EL SIAL es una iniciativa de desarrollo rural, que busca contribuir a la soberanía alimentaria a partir de la experimentación campesina y la articulación de componentes y procesos en función de una gestión participativa de la innovación. El SIAL junta a productoras y productores, representantes de gobierno, de centros de investigación científica, de universidades, y asociaciones en una plataforma de coordinación multiactoral para fortalecer la toma de decisiones y el impacto de estas a nivel municipal de una manera descentralizada, de abajo hacia arriba (Ortiz Pérez, 2013; 2016). En esta sección describimos la experiencia de la EEPFIH en este proceso desde la segunda fase de PIAL (a partir de 2008).

El CLIA, creado en el año 2008, acompañó la transformación de 25 fincas campesinas, pertenecientes a nueve Cooperativas de Créditos y Servicios<sup>3</sup> en ocho municipios de la provincia de Matanzas. Mediante esta relación se incursionó en los nuevos conceptos que describen el modo “contexto-céntrico” de generación de conocimiento, en el que la fusión de saberes confiere mayor contextualidad, transdisciplinariedad, ética y participación en las transformaciones que se implementan (De Souza Silva *et al.*, 2005).

En una primera etapa (2008-2011), el trabajo se dirigió a diagnosticar los sistemas productivos, a facilitar el acceso a la diversidad biológica y a realizar acciones de divulgación que permitieran la formación de redes relacionadas con la seguridad alimentaria, la agroecología y el cambio climático. Dichas redes tenían como premisa que la introducción de una innovación en el proceso productivo tendría eficiencia siempre y cuando los productores estuvieran asociados desde el inicio a los nuevos procedimientos y a la gestión de la innovación misma.

En ese momento, las fincas vinculadas al trabajo eran carentes de diversidad y en ningún caso superaban las 23 especies; sus suelos eran de media y baja fertilidad. Tampoco se integraba el componente silvícola a los sistemas de producción animal. La ganadería predominante era vacuna y la producción de leche se encontraba en el rango de 3 a 5 kg/vaca en ordeño/día. La actividad ganadera y la aplicación de fertilizantes nitrogenados sintéticos constituían las fuentes más importantes de emisiones de gases de efecto invernadero.

Ante esta problemática, era preciso facilitar la transformación hacia sistemas productivos que significaran el sustento de las futuras generaciones desde una posición de cooperación y de cuidado de la naturaleza, mediante el diseño de ambientes productivos que tuvieran la diversidad, la estabilidad y la resiliencia de los ecosistemas naturales. La primera tarea fue satisfacer las demandas de capacitación, dirigidas a aspectos técnicos vinculados a agricultura y ganadería sostenibles, a la vez que se elaboraron las estrategias de transformación que dieran respuesta a las problemáticas particulares identificadas (Miranda, *et al.*, 2010).

En un período de cuatro años se capacitaron a más de 500 beneficiarios directos en eventos protagonizados por los productores, revalorizando con ello los principios de la metodología “Campesino

---

<sup>3</sup> Las Cooperativas de Crédito y Servicio son un tipo de cooperativa de productores donde los miembros gestionan la producción en sus tierras de forma independiente, pero se agrupan como cooperativa para acceder y compartir créditos y servicios, infraestructura y mercados.

a Campesino”. Esta metodología participativa y sencilla permite que la mayor parte de las actividades sean dominadas y manejadas por campesinas y campesinos. Es una forma participativa de promover y mejorar los sistemas productivos campesinos, partiendo del principio de la participación y el empoderamiento (Machín Sosa, *et al.*, 2010). En este sentido, se promovieron los intercambios, la experimentación campesina y visitas a diferentes experiencias exitosas que permitieron la construcción concertada de respuestas objetivas y adaptadas a los problemas de las localidades, las fincas y de los sistemas productivos, a la vez que facilitaron la identificación de nuevos interesados en las novedosas prácticas. La capacitación se presentó como un proceso modificador de los conocimientos, habilidades y saber-hacer de los productores.

El trabajo conjunto de los productores y los técnicos posibilitó diversificar las áreas productivas de las fincas de forma escalonada. Se incrementó la diversidad del estrato herbáceo a partir de la introducción de variedades de gramíneas y leguminosas volubles que confieren una mayor productividad a los sistemas debido al aumento del rendimiento y la calidad de la biomasa disponible por unidad de superficie. Esto permitió aumentar la producción de leche a valores entre 6-8 kg./vaca en ordeño/día (Sánchez *et al.*, 2011). A su vez, las Ferias de diversidad<sup>4</sup> organizadas por los productores a nivel local facilitaron la disseminación participativa de 74 especies de granos, pastos y vegetales.

De forma gradual se transformaron 80 ha dedicadas a la producción animal, de las cuales 43 ha están en explotación y han permitido el incremento de la productividad de las fincas. En estos espacios se logró la introducción de pastos mejorados de 12 especies forrajeras herbáceas y de 115 000 árboles de siete especies forrajeras arbóreas de gran valor nutricional. Al mismo tiempo se logró la disseminación y establecimiento de 4 780 árboles maderables y frutales de 25 especies, con el objetivo de diversificar las actividades productivas de las fincas. Se promovió el uso de bioproductos y del cultivo de cobertura como prácticas alternativas para el cuidado de los suelos.

Esta diversidad de especies y variedades favorecía el volumen de la cobertura vegetal y las áreas forestadas en las fincas, lo que propiciaba los servicios ambientales generados por estos ecosistemas tales como: el secuestro de carbono, la diversidad, el manejo integrado de los componentes del sistema y la reforestación. Estos dos últimos servicios determinaron un salto en cuanto a la reducción de emisiones,

---

<sup>4</sup> Ferias para mostrar la diversidad vegetal (de cualquier cultivo o especie animal) organizadas por los campesinos de determinada región o municipio, o por un campesino en particular, con el fin de estimular la diversificación productiva.

así como el secuestro de carbono en las fincas. Se incrementó de 10 a 42 t por hectárea con respecto al año base 2007 (Tabla 1).

Tabla 1. Cambio en # de árboles, densidad de plantas y carbono almacenado en 25 fincas que participaron en intervenciones del CLIA \*\*

| Período                 | Número de árboles | Densidad (plantas/ha) | C forestal almacenado (t de C/ha)* |
|-------------------------|-------------------|-----------------------|------------------------------------|
| Antes del CLIA (2007)   | 46                | 1,4                   | 10                                 |
| Después del CLIA (2011) | 3 546             | 107,5                 | 42                                 |

Fuente: Miranda *et al.* (2011)

\*Calculado según Mercadet y Álvarez (2005)

\*\*Centro Local de Innovación Agropecuaria

Se hizo énfasis en la conexión de las variables medioambientales y socioeconómicas que representaban un mayor bienestar para sus familias. Al mismo tiempo se fomentaron sistemas de innovación que facilitaron la articulación de actores, que consideraban el saber local y las necesidades de los productores como elementos sustanciales en la generación colectiva de alternativas para la producción de alimentos.

#### *La creación del SIAL*

En el marco creado por la unión de PIAL y las experiencias de la EEPFIH descritas anteriormente, se trabajó en la planificación estratégica<sup>5</sup> de dos municipios de la provincia y de cada uno de sus Organismos de la Administración Central del Estado (OACEs) subordinados o no, al Consejo de Administración Municipal (CAM)<sup>6</sup>, tomando como referencia el Programa de Desarrollo Integral<sup>7</sup>, que resumían las transformaciones proyectadas.

---

<sup>5</sup> La planificación estratégica es la elaboración, desarrollo y puesta en marcha de distintos planes operativos por parte de las empresas u organizaciones, con la intención de alcanzar objetivos y metas proyectadas. Estos planes pueden ser a corto, mediano o largo plazo.

<sup>6</sup> Los Consejos de Administración Municipales (CAM) dirigen las entidades económicas, de producción y de servicios de subordinación local, con el propósito de satisfacer las necesidades económicas, de salud y otras de carácter asistencial, educacionales, culturales, deportivas y recreativas de la colectividad del territorio a que se extiende la jurisdicción de cada una. Constituyen en Cuba el órgano de Gobierno a nivel de municipio.

<sup>7</sup> Programa de Desarrollo Integral Municipal (PDIM). Inicialmente ese programa fue un modelo de planificación proactiva de los territorios en función de transformar sus problemas utilizando las potencialidades y oportunidades

Considerando la congruencia de esta propuesta con la del Programa de Innovación Agrícola Local (PIAL), se inició un trabajo que tuvo como objetivo acompañar a los territorios en la implementación de sus Programas de Desarrollo Integral mediante la creación y consolidación de un Sistema de Innovación Agropecuaria Local (SIAL), mediante el cual se articulan componentes (tangibles e intangibles) y procesos en función de una gestión participativa de la innovación (Figura 1). Todo lo cual permite responder a demandas locales de desarrollo en el ámbito agropecuario, con base en el aprovechamiento de las capacidades locales.

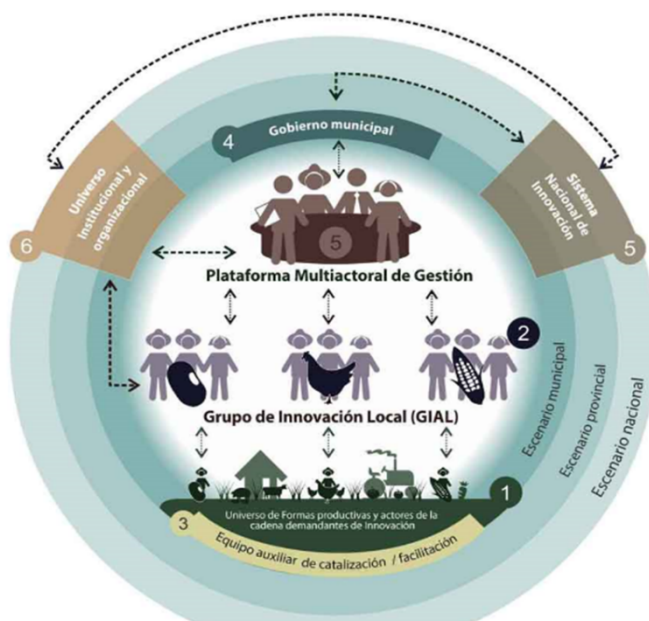

Figura 1. Esquema del sistema de Innovación Agropecuaria Local (SIAL) Tomado de Ortiz, 2016.

En este sentido, se ha logrado la integración de diversos actores (ej. productores, centros de investigación, universidades, representantes del gobierno local y de los organismos de la administración central del Estado), para identificar e implementar estrategias, proyectos y programas de desarrollo a escala local.

locales, pero con un respaldo financiero por parte del Ministerio de Economía y Planificación (MEP). Se desarrolló en 10 municipios del país como experiencia, con el apoyo de instituciones locales, provinciales y nacionales. Aunque posteriormente el Estado no tuvo posibilidades de apoyar financieramente en su totalidad estos planes, sí han constituido una poderosa herramienta en manos del Gobierno Municipal a la hora de invertir en el desarrollo los escasos recursos que obtiene. Los PDIM están conformados de forma tal que todos los proyectos, actividades, acciones y recursos se dirigen al cumplimiento de los objetivos trazados en el mismo, ya sean de índole económica, social, ambiental o institucional.

También se ha conseguido la inserción de las acciones del proyecto en el tejido institucional de los municipios a través de la creación de la Plataforma Multiactoral de Gestión (PMG) y los Grupos de Innovación Agropecuaria (GIAL), los que, como componentes tangibles, integran sus esfuerzos en un espacio físico donde se estimula el aprendizaje y la interacción de los actores para gerenciar y conducir efectiva y participativamente el desarrollo agropecuario de un territorio a partir de la identificación de desafíos e intereses comunes.

La Plataforma (PMG), en sí, constituye un espacio estratégico para la concertación del Programa de Desarrollo Integral Municipal, organizado en programas y subprogramas. En esta se logra la articulación de los proyectos socioculturales e institucionales existentes en el territorio y se identifican y debaten líneas estratégicas que permiten el desarrollo de actividades de alto impacto, relacionadas con la producción de alimentos, energía y de protección medio-ambientales, de las cuales se derivan propuestas de proyectos para el desarrollo local que son presentadas y aprobadas por el Consejo de la Administración Municipal (CAM).

Aunque el énfasis principal estuvo orientado al sector agropecuario en la provincia Matanzas, los esfuerzos se han dirigido hacia una propuesta más integradora que resalta el enfoque sistémico para no prescindir de ninguno de los actores que hacen posible el desarrollo local. En este sentido, se logró promover procesos de aprendizaje en la acción que movilizaron a los actores de sectores productivos y de servicios.

Simultáneamente, se gestionan e impulsan programas de formación de competencias que permitan garantizar las capacidades necesarias para la implementación de los procesos de desarrollo. Esta labor la realiza el Grupo de Gestión del Conocimiento y la Innovación (anclado en la universidad local<sup>8</sup>) como parte de las funciones que el Ministerio de Educación Superior ha encargado a sus unidades docentes territoriales en el Programa Gestión Universitaria del Conocimiento y la Innovación para el Desarrollo (GUCID). Este grupo tiene como misión contribuir con los procesos de producción y asimilación de conocimientos, orientados básicamente a atender necesidades de la población mediante procesos de participación y a instrumentar un sistema de evaluación del impacto de los resultados de desarrollo económico, social, cultural y medio ambiental del territorio.

---

<sup>8</sup> En Cuba, la Universalización de la Enseñanza llevó a la creación de centros universitarios municipales, o filiales universitarias adscritas a una Universidad matriz ubicada en la región. En el caso que nos ocupa la Universidades locales están adscrita a la Universidad de Matanzas.

La innovación local se desarrolla, entonces, a partir de la atención a determinados desafíos agropecuarios o no agropecuarios, los cuales se resuelven mediante el aprendizaje interactivo que combina de forma efectiva el conocimiento científico y el local, de gran consistencia para el caso cubano por el alto nivel de instrucción que posee la población, aspecto que incluye a los campesinos.

Este trabajo ha permitido la emergencia de nuevas iniciativas y el apoyo del gobierno, a actividades económicas en el sector no estatal productivo y de servicios, con el objetivo de promover encadenamientos productivos a nivel local y estimular la gestión de la transformación, a través de aprendizajes, en los que la concertación de nuevas prácticas con los saberes locales logrará la formación de competencias (técnicas, gerenciales y humanas). A su vez estas incidirán de forma positiva en los múltiples espacios sociales de innovación que surgieron del esfuerzo colectivo.

## **Los nuevos retos de la Ciencia en Cuba**

En tal sentido y para lograr respuestas coherentes desde la academia, se deben hacer esfuerzos para lograr un equilibrio entre la ciencia intensiva o básica y la ciencia conectada con la producción, la economía y la sociedad. Esto se traduce en ir de una política centrada en la ciencia a una política centrada en la innovación. El desarrollo de proyectos basados en invertir dinero para obtener conocimiento, ahora con un enfoque innovador sería invertir conocimiento para obtener retorno económico (Díaz *et al.*, 2014).

El desarrollo territorial considera que todo espacio geográfico es un sistema abierto y complejo; por tanto, el crecimiento económico en un territorio es exógeno, mientras que el progreso social es endógeno. Desde esta premisa, la particularidad estriba en “endogenizar” el desarrollo con base en potenciales locales, a partir de los procesos de negociación hacia el entorno (Díaz *et al.*, 2014, González *et al.*, 2013).

Para ello se requiere de un cambio en instituciones y organizaciones en el ámbito académico-institucional. Es menester la formación de competencias en investigadores y técnicos que permitan la consolidación de un modelo de innovación que no esté diseñado para transferir conocimientos científicos al campesinado de forma lineal, porque es insuficiente para lograr fortalecer sus capacidades de gestión.

Se trata de complementar los conocimientos y aportes de la ciencia con capacidades locales para gestionar su aplicación práctica mediante la acción conjunta. De manera que esto permita construir nuevas propuestas que se diseminan de forma espontánea en una masa significativa de innovadores e innovadoras en cada uno de los escenarios donde la ciencia tiene la misión de llegar (Ortiz *et al.*, 2014).

## **Conclusiones**

La adopción de un enfoque de sistema, donde el hombre es el centro y el fin de las transformaciones, y se incluye como protagonista de las intervenciones en la realidad, ha hecho de la EEPFIH una institución capaz de responder eficazmente a demandas de la sociedad cubana en integración con otras instituciones académicas, gubernamentales y no gubernamentales.

La comprensión de la necesidad de cambio en el modo de promover la transformación ha permitido que las instituciones modifiquen la manera en que se ven en el marco del territorio y su compromiso con el proceso de gestión de su desarrollo.

Los esfuerzos dirigidos a la creación de nuevas maneras de gestión del conocimiento han permitido la apertura de espacios de intercambio e innovación más horizontal y el establecimiento de nuevos mecanismos de planificación y gestión que estimulan la consolidación de alianzas y vínculos entre los actores locales. Estas nuevas maneras de gestión de conocimiento y espacios de intercambio e innovación horizontal son esenciales para efectivamente abarcar las problemáticas del desarrollo sostenible local.

## **Contribuciones**

Contribuyo a concepción y diseño: TMT, HMM, ASP

Contribuyo a levantamiento de datos: TMT, HMM, ASP, LLL, KOC, JAAY, MAGN, IMCA

Contribuyo al análisis e interpretación de datos: TMT, HMM, ASP, LLL, KOC, JAAY, MAGN, IMCA

Redacto y/o edito artículo: TMT, HMM, ASP

Aprobó y entrego versión para publicación: TMT, HMM

## **Agradecimientos**

Roger Orlando Hernández, Ramiro Ruíz Ruíz, Tatiana Tabío Villaurrutia, Katia García Martínez, Noraida Nodarse Coto, Walfrido J. Chaples Valle, Anier Hernández Martínez, Geyuski González Flores, Daniel Vela de León, Gilberto Blanco García, Juan Carlos Lezcano Fleires, Frank David Tirado García, Giraldo J Martín Martín, Mercedes Falcón Perdomo, Taymi Figueroa Peguero, Raquel Pérez Cano, Aida I Cruz Martínez, Leybis González González.

## **Información de Fondos**

Agencia Suiza para la Cooperación y el Desarrollo (COSUDE), Cuba. CATIE, Costa Rica. Consejo de Iglesias de Cuba. ICRA, Holanda. Escuela Superior del PCC, Programa de pequeñas donaciones. Fondo para el medio ambiente mundial. Programa de las Naciones Unidas para el desarrollo, Cuba

## **Intereses que Compiten**

Los autores declaran que no existe interés de competencia con este artículo.

## Referencias

Álava Atiencie, G., Orellana Espinoza, E. 2014. Metodologías participativas con enfoque integrador desde la complejidad. *Revista Economía y política* 20: 29-78.

Albuquerque, F., Pérez, S. R. 2013. El desarrollo territorial: enfoque, contenido y políticas. Programa Conecta DEL. BID/FOMIN

Álvarez, F., Mato, M. A. Santamaría, J. Cheaz, J., De Souza Silva, J. 2005. El arte de cambiar las personas que cambian las cosas. El cambio conceptual del ser humano desde su contexto cambiante. Quito, Ecuador: RED NUEVO PARADIGMA.

Aznar Minguet, P., Barrón Ruiz, A. 2017. El desarrollo humano sostenible: un compromiso educativo. *Teor. educ.* 29(1): 25-53.

De Souza Silva, J., Cheaz, J., Santamaría, J., Mato Bode, M. A., Valle Lima, S., Gomes de Castro, A. M., Salazar, L., Maestrey Boza, A., Rodríguez, N., Sambonino, P., Álvarez-González, F. J. 2005. La Innovación de la Innovación Institucional: De lo universal, mecánico y neutral a lo contextual, interactivo y ético desde una perspectiva latinoamericana. Quito, Ecuador: Editorial RED NUEVO PARADIGMA.

Díaz, M. F., Díaz Untoria, J. A., Valenciaga, D., Martínez, M., Rodríguez, Z., Martínez, Y. 2014. Resultados y alcance del Sistema de Ciencia e Innovación del Instituto de Ciencia Animal de Cuba. *8vo Congreso de Producción Animal*. Universidad Autónoma Metropolitana. Unidad Xochimilco. México.

Dourojeanni, A. 2000. Procedimientos de gestión para el desarrollo sustentable. CEPAL. División de Recursos Naturales e Infraestructura. Serie Manuales, No. 10. Santiago de Chile, Chile.

González, L., Machado, H., Suset, A., Campos, M., Miranda, T. 2003a. Diagnóstico participativo para el desarrollo rural sostenible: una experiencia comunitaria. *Pastos y Forrajes* 26(1): 79-86.

González, L.; Machado, H.; Suset, A. 2003b. Diagnóstico de las principales limitaciones en las UBPC ganaderas: Un estudio de caso territorial. *Pastos y Forrajes*. 26(2): 63-170.

González, J. G., García-Velasco, R., Ramírez-Hernández, J. J., Castañeda-Martínez, T. 2013. La territorialización de la política pública en el proceso de gestión territorial como praxis para el desarrollo. *Cuadernos de Desarrollo Rural* 10(72): 243-265. <http://xn--www-xda.redalyc.org/articulo.oa?id=11729823011>.

González, A. 1995. La economía cubana en 1994 y escenarios para 1995. Revista Cuba: Investigación Económica 1.

IUCN. 1997. Equipo Internacional de Evaluación. Evaluación del progreso hacia la sostenibilidad. Enfoques, métodos, herramientas y experiencias de campo. Costa Rica: IUCN, Serie Herramientas y Capacitación.

Machado, H., Cruz, A., Suset, A., Miranda, T.; Campos, M.; Duquesne, P. 2008. Metodología para el diagnóstico participativo y la planificación estratégica en municipios rurales y entidades productivas y de servicios. Matanzas, Cuba: Estación Experimental "Indio Hatuey".

Machado, H., Suset A., Martín G., Funes-Monzote F.R. 2009. Del enfoque reduccionista al enfoque de sistema en la agricultura cubana: un necesario cambio de visión. Pastos y Forrajes 32(3): 215-235.

Machado, H., Suset, A., Miranda, T., Campos, M. et al., 2013. Programas Integrales para el desarrollo local. Municipios Martí y Perico. Universidad y Desarrollo Local. Nueva Empresa 9(3): 100-104.

Machín-Sosa, B., Roque-Jaime, A. M. Ávila-Lozano, D. R. 2010. Revolución agroecológica: el movimiento de campesino a campesino de la ANAP en Cuba. Cuando el campesino ve, hace fe. Havana: ANAP and La Vía Campesina. <http://www.viacampesina.org/downloads/pdf/sp/2010-04-14-rev-agro.pdf>.

Mercadet, A., Álvarez, A. 2005. Metodología para el establecimiento de la línea base de retención de carbono por las empresas forestales de Cuba. Informe final del Subproyecto 11.25.03. La Habana, Cuba: Programa Ramal de Medio Ambiente, MINAG.

Mesa, A., Machado, H. 2009. Capacitación de productores y directivos para la adopción de tecnologías de producción animal sostenible. Pastos y Forrajes 32(1): 93-100.

Miranda, T., Machado, H., González, L., Cruz, A., Suset, A. 2002. Algunas consideraciones sobre la autonomía de gestión: Elementos deficitarios en entidades productivas de un territorio. Pastos y Forrajes 25(4): 147-153.

Miranda, T., Sánchez, T., Sánchez, S., Lamela L., Suset, A. 2010. La innovación agrícola local como alternativa de desarrollo. Algunos resultados en la provincia Matanzas, Cuba. Memoria. 3<sup>ER</sup> Congreso Internacional y 12do Congreso Nacional de Investigación Socioeconómica y Ambiental de la producción Pecuaria: Producción Ganadera, Justicia Alimentaria y Cambio Climático. Morelia, México.

Miranda, T., Sánchez, S., Sánchez, T., Lamela, L., Álvarez D. 2011. Innovación local participativa ante el cambio climático. In: H. Rios Labrada, D. Vargas Blandino, F.R. Funes-Monzote, ed. 2011. *Innovación*

*agroecológica, adaptación y mitigación del cambio climático*. Mayabeque, Cuba: Instituto Nacional de Ciencias Agrícolas (INCA).

Miranda, T., Machado, H., Suárez, J., Sánchez, T., Lamela, L., Iglesias, J. M., Suset, A., Pérez, A., Milera, M., Martín, G. J., Campo, M., López, O., Sánchez, S., Simón, L. 2012. La innovación y la transferencia de tecnologías en la Estación Experimental 'Indio Hatuey': 50 años propiciando el desarrollo del sector rural cubano (Parte II). *Pastos y Forrajes* 35(1): 3-16.

Ortiz, P. R., Angarica, L., Guevara, H. F. 2014. Beneficios obtenidos en fincas participantes en el Programa de Innovación Agropecuaria Local (PIAL) en Cuba. Análisis costo/beneficio de la intervención. *Cultivos Tropicales* 35(3): 107-112.

Ortiz Pérez, R. 2013. *La biodiversidad agrícola en manos del campesinado cubano*. Mayabeque, Cuba: Instituto Nacional de Ciencias Agrícolas.

Ortiz, R. 2016. Sistema de Innovación Agropecuaria Local, SIAL. 2016. Tríptico del proyecto. Havana, Cuba: SIAL.

Paleologos, M. F., Iermanó, M. J., Blandi, M. L., Sarandón, S. J. 2017. Las relaciones ecológicas: un aspecto central en el rediseño de agroecosistemas sustentables, a partir de la Agroecología. *Redes* 22(2): 92-115.

Pichs, R. 2002. Los retos del desarrollo sostenible en América Latina. [www.redem.buap.mx/ramon.htm](http://www.redem.buap.mx/ramon.htm).

Sánchez, T., Lamela, L., Miranda, T., López, O., Bover, K. 2011. Tecnologías alternativas: silvopastoreo. In: H. Rios Labrada, D. Vargas Blandino, F.R. Funes-Monzote, ed. 2011. *Innovación agroecológica, adaptación y mitigación del cambio climático*. Mayabeque, Cuba: Instituto Nacional de Ciencias Agrícolas (INCA).

Sarandón, S. J., Flores, C. 2009. La agroecología: el enfoque necesario para una agricultura sustentable. *Agroecología* 4: 19-28.

Suset, A., Machado, H., Miranda, T., Campos, M., Duquesne, P. 2007. La necesidad del enfoque participativo en las transformaciones al sector rural y agropecuario. Estudio de casos en la provincia de Matanzas, Cuba. *II Encuentro Internacional de Desarrollo Agrario y Rural (Memorias) [2nd International Conference on Agrarian and Rural Development (Reports)]*. San José de las Lajas, Cuba: Universidad Agraria de La Habana.

Suset, A. 2011. La estructura agropecuaria y su incidencia en el desarrollo del territorio. Estudio de caso en el municipio Martí, provincia de Matanzas [dissertation]. Havana, Cuba: Universidad de La Habana, Ciencias Sociológicas.

Suset, A., Miranda, T., Machado, H., Gonzalez, E., Nicado, O. 2013. El municipio como escenario protagónico de las actuales transformaciones agropecuarias en Cuba. Pastos y Forrajes 36(1): 116-122.

Venegas, R., Siau, G. 1994. Conceptos, principios y fundamentos para el diseño de sistemas sustentables de producción. Revista CLADES 7. Available at <http://www.clades.org/revistas/7/rev7art3.htm>.

Viniegra-Velázquez, L. 2014a. El reduccionismo científico y el control de las conciencias: Parte II. Boletín Médico del Hospital Infantil de México 71(5): 323-328.

Viniegra-Velázquez L. 2014b. El reduccionismo científico y el control de las conciencias. Parte I. Boletín Médico del Hospital Infantil de México. 71(4): 252-257.
